# Supplementary material
Source: MDPI journal article supplement (https://www.mdpi.com/2673-1991/3/2/32)
Supplement: s1 [file s1]

**Table S1:** Human and Animal Studies Literature Overview in Alphabetical Order

| Human Studies in alphabetical order                                                                                                                                                                             | Year | Journal                                          | Study Type             |
|-----------------------------------------------------------------------------------------------------------------------------------------------------------------------------------------------------------------|------|--------------------------------------------------|------------------------|
| Barret JP, Herndon DN. Modulation of inflammatory and catabolic responses in severely burned children by early burn wound excision in the first 24 hours.                                                       | 2003 | Arch Surg                                        | Retrospective Analysis |
| Coert JH. Pathophysiology of nerve regeneration and nerve reconstruction in burned patients.                                                                                                                    | 2010 | Burns                                            | Pathophysiology Review |
| Fuchs S. Klinische Studie : Regenerationspotential der Hautsensibilität nach thermischen Hautschädigungen im Kindesalter Clinical trial : regeneration of skin perception after deep-degree burns in childhood. | 2017 | Handchir Mikrochir Plast Chir                    | Retrospective Analysis |
| Helm PA, Johnson ER, Carlton AM. Peripheral neurological problems in the acute burn patient.                                                                                                                    | 1977 | Burns                                            | Retrospective Analysis |
| Henderson B, Koepke GH, Feller I. Peripheral polyneuropathy among patients with burns.                                                                                                                          | 1971 | Archives of Physical Medicine and Rehabilitation | Retrospective Analysis |
| Hermanson A, Jonsson C, Lindblom U. Sensibility after burn injury.                                                                                                                                              | 1986 | Clin Physiol                                     | Retrospective Analysis |
| Khedr EM. Peripheral neuropathy in burn patients.                                                                                                                                                               | 1997 | Burns                                            | Retrospective Analysis |
| Kowalske K, Holavanahalli R, Helm P. Neuropathy after burn injury.                                                                                                                                              | 2001 | J Burn Care Rehabil                              | Retrospective Analysis |
| Lee MY, Liu G, Kowlowitz V et al. Causative factors affecting peripheral neuropathy in burn patients.                                                                                                           | 2009 | Burns                                            | Retrospective Analysis |
| Malenfant A, Forget R, Amsel R et al. Tactile, thermal and pain sensibility in burned patients with and without chronic pain and paresthesia problems.                                                          | 1998 | Pain                                             | Retrospective Analysis |
| Malenfant A, Forget R, Papillon J. et al. Prevalence and characteristics of chronic sensory problems in burn patients.                                                                                          | 1996 | Pain                                             | Retrospective Analysis |
| Marquez S, Turley JJ, Peters WJ. Neuropathy in burn patients                                                                                                                                                    | 1993 | Brain                                            | Retrospective Analysis |

|                                                                                                                                                                       |      |                     |                                                  |
|-----------------------------------------------------------------------------------------------------------------------------------------------------------------------|------|---------------------|--------------------------------------------------|
| Nedelec B, Hou Q, Sohbi I et al. Sensory perception and neuroanatomical structures in normal and grafted skin of burn survivors.                                      | 2005 | Burns               | Retrospective Analysis                           |
| Sepulchre C, Moati F, Miskulin M et al. Biochemical and pharmacological properties of a neurotoxin protein isolated from the blood serum of heavenly burned patients. | 1979 | J Pathol            | Clinical Study                                   |
| Stella M, Calcagni M, Teich-Alasia S, Ramieri G, Cellino G, Panzica G. Sensory endings in skin grafts and scars after extensive burns.                                | 1994 | Burns               | Retrospective Analysis                           |
| Strong AL, Agarwal S, Cederna PS, Levi B. Peripheral neuropathy and nerve syndromes in burns.                                                                         | 2017 | Clin Plast Surg     | Review                                           |
| Tsolakidis S, Rosenauer R, Schmidhammer R, Pallua N, Rennekampff HO. Wireless microcurrent stimulation improves blood flow in burn wounds.                            | 2021 | Burns               | Prospective, non-randomized interventional study |
| Ward RS, Tuckett RP. Quantitative Threshold Changes in Cutaneous Sensation of Patients with Burns.                                                                    | 1991 | J Burn Care Rehabil | Retrospective Analysis                           |

| <b>Animal Studies in alphabetical order</b>                                                                                           | <b>Year</b> | <b>Journal</b>          | <b>Study Type</b>             |
|---------------------------------------------------------------------------------------------------------------------------------------|-------------|-------------------------|-------------------------------|
| Brauer R.O., Spira M. Full-thickness burns as source for donor graft in the pig.                                                      | 1950        | Plast & Reconst Surg    | Experimental                  |
| Higashimori H, Carlsen RC, Whetzel TP. Early excision of a full-thickness burn prevents peripheral nerve conduction deficits in mice. | 2006        | Plast Reconstr Surg     | Experimental                  |
| Kadanoff D. Histologische Untersuchungen über die Regeneration sensibler Nervenendigungen in Hauttransplantaten.                      | 1925        | Klinische Wochenschrift | Anatomical/Histological Study |

|                                                                                                                         |      |                    |              |
|-------------------------------------------------------------------------------------------------------------------------|------|--------------------|--------------|
| Kim C, Martyn J., Fuke. Burn injury to trunk of rat causes denervation-like responses in the gastrocnemius muscle.      | 1988 | Br J Pharmacol     | Experimental |
| Morellini NM, Fear MW, Rea S, West AK, Wood FM, Dunlop SA. Reinnervation and nociception after burn injury.             | 2012 | Wound Repair Regen | Experimental |
| Saffari TM, Schüttenhelm BN, van Neck JW, Holstege JC. Nerve reinnervation and itch behavior in a rat burn wound model. | 2018 | Wound Repair Regen | Experimental |
| Tomera JF, Martyn J. Mediators of burn-induced neuromuscular changes in mice.                                           | 1989 | Br J Pharmacol     | Experimental |
